# Supplementary material for: CoS2xSe2(1−x)nanowire array: an efficient ternary electrocatalyst for the hydrogen evolution reaction
Source: Royal Society of Chemistry journal article supplement (doi:10.1039/c5nr07735d), 2016-01-01
Supplement: c5nr07735d1.pdf [file c5nr07735d1.pdf]

## Supporting Information

### **CoS<sub>2</sub>xSe<sub>2(1-x)</sub> Nanowire Array: An Efficient Ternary Electrocatalyst for Hydrogen Evolution Reaction**

Kaili Liu<sup>a,b,c,†</sup>, Fengmei Wang<sup>a,b,†</sup>, Kai Xu<sup>a,b</sup>, Tofik Ahmed Shifa<sup>a,b</sup>, Zhongzhou Cheng<sup>a</sup>, Xueying Zhan<sup>a</sup> and Jun He<sup>a,\*</sup>

<sup>a</sup>CAS Key Laboratory of Nanosystem and Hierarchical Fabrication, National Center for Nanoscience and Technology, 100190, Beijing, P. R. China.

<sup>b</sup>University of Chinese Academy of Science, No.19A Yuquan Road, Beijing 100049, China.

<sup>c</sup>Sino-Danish Center for Education and Research, Beijing, 100190, China.

<sup>†</sup> These authors contributed equally to this work.

#### **Synthesis of CoS<sub>2</sub> NWs**

The CFs, onto which CoO NWs grew, was placed at the downstream side of the tube furnace and 0.5 g S powder was placed at the upstream side (the distance of CF and S powder is 22 cm). To create an oxygen-free environment, the tube furnace was flushed three times under a 100 sccm Ar flow. After flushed with Ar, the temperatures of the CoO NWs zone and S powder zone were quickly raised to 450 °C and 125 °C respectively in 20 min and lasted for 90 min. During the whole process, the flow of Ar was kept at a rate of 100 sccm.

#### **Synthesis of CoSe<sub>2</sub> NWs**

The CFs, onto which CoO NWs grew, was placed at the downstream side of the tube furnace and 0.5 g Se powder was placed at the upstream side (the distance of CF and Se powder is 22 cm). To create an oxygen-free environment, the tube furnace was flushed three times under a 100 sccm Ar flow. After flushed with Ar, the temperatures of the CoO NWs zone and Se powder zone were quickly raised to 450 °C and 300 °C respectively in 20 min and lasted for 90 min. During the whole process, the flow of Ar was kept at a rate of 100 sccm.

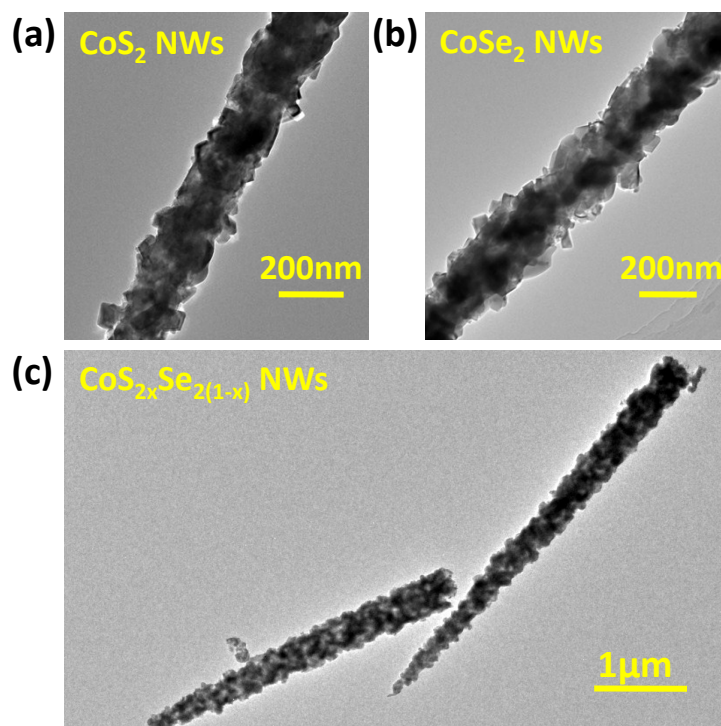

**Fig. S1.** TEM image of CoS<sub>2</sub> NWs (a), CoSe<sub>2</sub> NWs (b) and CoS<sub>2x</sub>Se<sub>2(1-x)</sub> NWs (c).

**Fig. S2.** XRD patterns of CoS<sub>2</sub> NWs and CoSe<sub>2</sub> NWs.

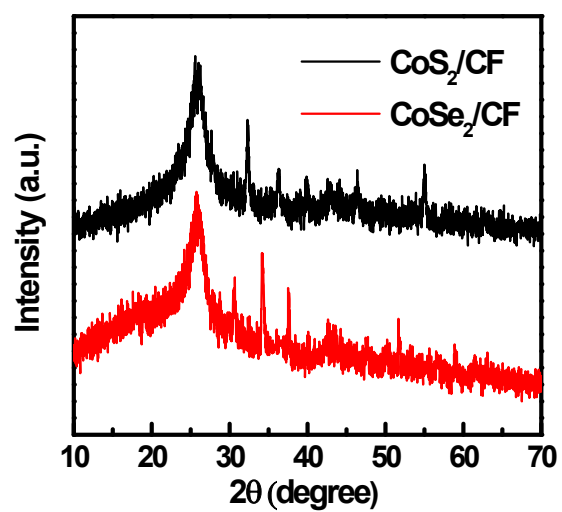

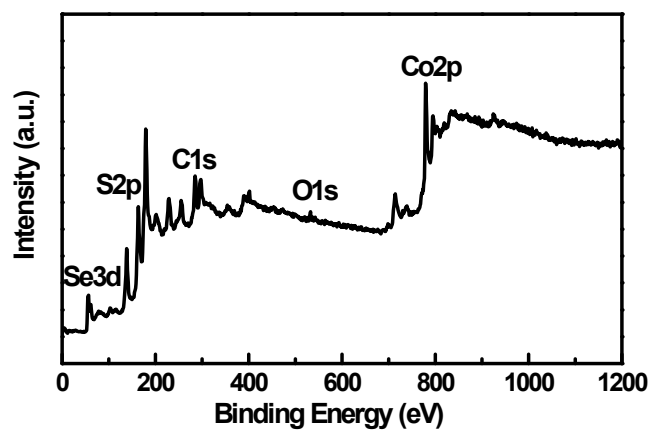

Fig. S3 XPS spectra of  $\text{CoS}_{2x}\text{Se}_{2(1-x)}$  NWs/CF.

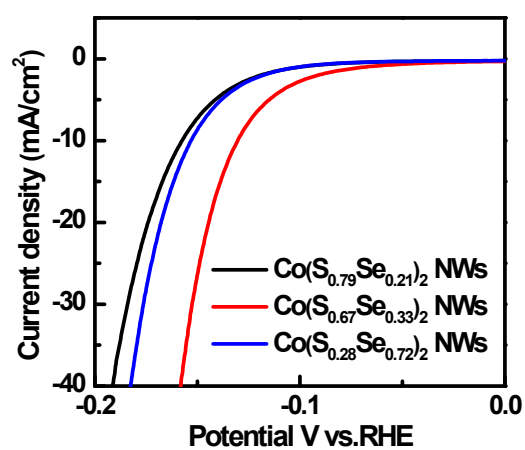

Fig. S4. Polarization curves of different ternary samples with various elemental components.

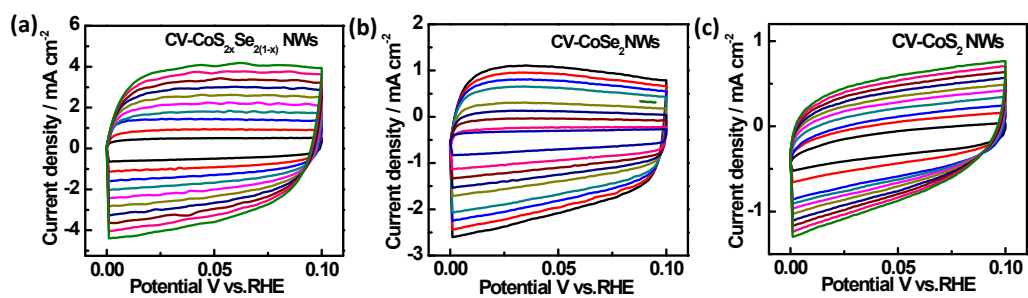

**Fig. S5.** Cyclic voltammograms (CV) curves of different catalysts:  $\text{CoS}_{2x}\text{Se}_{2(1-x)}$  NWs (a),  $\text{CoSe}_2$  NWs (b) and  $\text{CoS}_2$  NWs (c) at scan rates of 20 mV/s–200 mV/s.

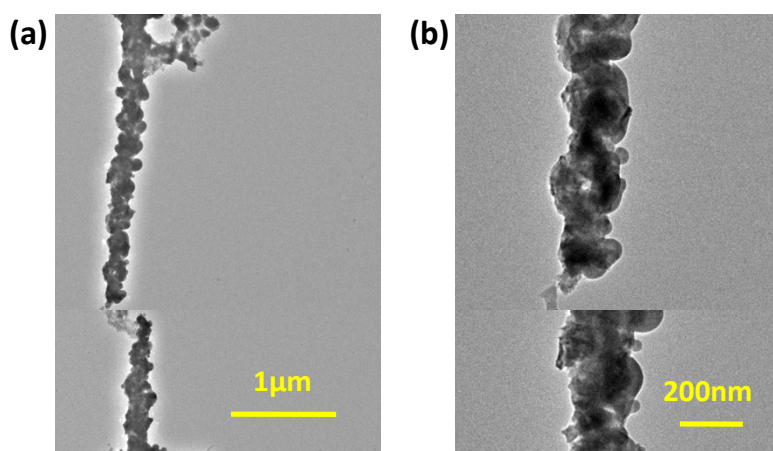

**Fig. S6.** Low magnification (a) and high magnification (b) TEM images of  $\text{CoS}_{2x}\text{Se}_{2(1-x)}$  NWs after 1000 potential cycles.
